# Supplementary material for: Unusual substituent effects on the bonding of iminoboranes
Source: Royal Society of Chemistry journal article supplement (doi:10.1039/b702480k), 2007-01-01
Supplement: b702480k.pdf [file b702480k.pdf]

## **Unusual substituent effects on the bonding of iminoboranes**

Otilia M<sup>[a]</sup>, Manuel Yáñez<sup>[a]</sup>, Angel Martín Pendás<sup>[b]</sup>, Janet E. Del Bene<sup>[c]</sup>,  
Ibon Alkorta<sup>[d]</sup>, and José Elguero<sup>[d]</sup>

*Contribution from Departamento de Química, C-9, Universidad Autónoma de Madrid, Cantoblanco, 28049-Madrid, Spain. Departamento de Química Física y Química Analítica. Facultad de Química. Universidad de Oviedo. 33006-Oviedo. Spain. Department of Chemistry, Youngstown State University, Youngstown, Ohio 44555 USA. Instituto de Química Médica, CSIC, Juan de la Cierva 3, E-28006 Madrid, Spain*

**Supporting Information (A total of 4 pages)**

Table S1. B3LYP/6-311++G(d,p) total energies in hartrees for substituted iminoboranes

| Compound                          | Energy         |
|-----------------------------------|----------------|
| HBNH                              | -80.8347929226 |
| CH <sub>3</sub> BNH               | -120.181846417 |
| NH <sub>2</sub> BNH               | -136.248997011 |
| OHBNH                             | -156.131054493 |
| FBNH                              | -180.157165392 |
| HBNCH <sub>3</sub>                | -120.154999450 |
| HBNNH <sub>2</sub>                | -136.162587515 |
| HBNOH                             | -156.002828892 |
| HBNF                              | -179.995541014 |
| CH <sub>3</sub> BNCH <sub>3</sub> | -159.500510509 |
| NH <sub>2</sub> BNNH <sub>2</sub> | -191.574126475 |
| OHBNOH                            | -231.296844096 |
| FBNF                              | -279.312700960 |

Table S2. MP2(fc)/6-311++G(d,p) Optimized structures. Cartesian coordinates in Å

CH<sub>3</sub>BNH

|   |   |           |           |           |
|---|---|-----------|-----------|-----------|
| 5 | 0 | 0.000000  | 0.000000  | 0.185660  |
| 7 | 0 | 0.000000  | 0.000000  | 1.435883  |
| 1 | 0 | 0.000000  | 0.000000  | 2.431009  |
| 6 | 0 | 0.000000  | 0.000000  | -1.361305 |
| 1 | 0 | 0.842612  | -0.578859 | -1.747552 |
| 1 | 0 | -0.922613 | -0.440294 | -1.747552 |
| 1 | 0 | 0.080001  | 1.019153  | -1.747552 |

NH<sub>2</sub>BNH

|   |   |           |           |           |
|---|---|-----------|-----------|-----------|
| 5 | 0 | 0.042362  | 0.000000  | 0.117408  |
| 7 | 0 | 0.013235  | 0.000000  | 1.380904  |
| 1 | 0 | 0.459938  | 0.000000  | 2.272697  |
| 7 | 0 | -0.127170 | 0.000000  | -1.275857 |
| 1 | 0 | 0.062899  | 0.841241  | -1.797535 |
| 1 | 0 | 0.062899  | -0.841241 | -1.797535 |

## OHBNH

|   |   |           |           |           |
|---|---|-----------|-----------|-----------|
| 5 | 0 | -0.018135 | -0.005931 | 0.068959  |
| 7 | 0 | -0.033082 | -0.010820 | 1.319127  |
| 1 | 0 | -0.059782 | -0.019553 | 2.312063  |
| 8 | 0 | -0.050127 | -0.016395 | -1.277646 |
| 1 | 0 | 0.783043  | 0.256106  | -1.669573 |

## FBNH

|   |   |          |          |          |
|---|---|----------|----------|----------|
| 5 | 0 | 0.000000 | 0.000000 | 0.035808 |
|---|---|----------|----------|----------|

|                                   |   |           |           |           |
|-----------------------------------|---|-----------|-----------|-----------|
| 7                                 | 0 | 0.000000  | 0.000000  | 1.280782  |
| 1                                 | 0 | 0.000000  | 0.000000  | 2.274318  |
| 9                                 | 0 | 0.000000  | 0.000000  | -1.268759 |
| HBNCH <sub>3</sub>                |   |           |           |           |
| 5                                 | 0 | 0.000000  | 0.000000  | -1.488343 |
| 7                                 | 0 | 0.000000  | 0.000000  | -0.238729 |
| 1                                 | 0 | 0.000000  | 0.000000  | -2.657130 |
| 6                                 | 0 | 0.000000  | 0.000000  | 1.180068  |
| 1                                 | 0 | 0.428123  | 0.930782  | 1.563180  |
| 1                                 | 0 | -1.020142 | -0.094625 | 1.563180  |
| 1                                 | 0 | 0.592019  | -0.836156 | 1.563180  |
| HBNNH <sub>2</sub>                |   |           |           |           |
| 5                                 | 0 | 0.052239  | -0.006082 | -1.443113 |
| 7                                 | 0 | -0.006925 | 0.000806  | -0.196758 |
| 1                                 | 0 | 0.085543  | -0.009959 | -2.610491 |
| 7                                 | 0 | 0.072337  | -0.008422 | 1.165700  |
| 1                                 | 0 | -0.307111 | 0.864558  | 1.521732  |
| 1                                 | 0 | -0.497512 | -0.770882 | 1.521732  |
| HBNOH                             |   |           |           |           |
| 5                                 | 0 | 0.014225  | -0.057527 | -1.410242 |
| 7                                 | 0 | -0.009650 | 0.039026  | -0.168570 |
| 1                                 | 0 | 0.022099  | -0.089373 | -2.576669 |
| 8                                 | 0 | 0.021285  | -0.086080 | 1.163663  |
| 1                                 | 0 | -0.195953 | 0.792469  | 1.498569  |
| HBNF                              |   |           |           |           |
| 5                                 | 0 | 0.000000  | 0.000000  | -1.385172 |
| 7                                 | 0 | 0.000000  | 0.000000  | -0.144582 |
| 1                                 | 0 | 0.000000  | 0.000000  | -2.551191 |
| 9                                 | 0 | 0.000000  | 0.000000  | 1.165458  |
| CH <sub>3</sub> BNCH <sub>3</sub> |   |           |           |           |
| 5                                 |   | 0.000000  | 0.000026  | -0.627871 |
| 7                                 |   | 0.000000  | 0.000001  | 0.623891  |
| 6                                 |   | 0.000000  | -0.000026 | 2.042020  |
| 1                                 |   | -0.886422 | 0.511741  | 2.429649  |
| 1                                 |   | 0.000000  | -1.023586 | 2.429617  |
| 1                                 |   | 0.886422  | 0.511741  | 2.429650  |
| 6                                 |   | 0.000000  | 0.000023  | -2.178006 |
| 1                                 |   | 0.884708  | 0.510794  | -2.567079 |
| 1                                 |   | 0.000000  | -1.021605 | -2.566720 |
| 1                                 |   | -0.884708 | 0.510794  | -2.567079 |
| NH <sub>2</sub> BNNH <sub>2</sub> |   |           |           |           |
| 5                                 |   | -0.000001 | -0.000010 | -1.510183 |

|   |           |           |           |
|---|-----------|-----------|-----------|
| 7 | -0.000001 | -0.000010 | -0.124401 |
| 1 | 1.053894  | -0.000010 | -2.067675 |
| 1 | -1.053896 | -0.000010 | -2.067675 |
| 7 | -1.142172 | 0.000006  | 0.716064  |
| 1 | -1.952572 | -0.085576 | 0.105671  |
| 1 | -1.176419 | 0.915444  | 1.160420  |
| 7 | 1.142171  | 0.000006  | 0.716064  |
| 1 | 1.176445  | -0.915430 | 1.160422  |
| 1 | 1.952566  | 0.085611  | 0.105668  |

OHBNOH

|   |           |           |           |
|---|-----------|-----------|-----------|
| 5 | -0.053793 | 0.006282  | -0.636779 |
| 7 | -0.240657 | 0.047693  | 0.617010  |
| 8 | 0.381512  | -0.094199 | 1.827759  |
| 1 | -0.324010 | 0.069046  | 2.462221  |
| 8 | -0.109802 | -0.057696 | -1.977889 |
| 1 | 0.103900  | 0.780853  | -2.396355 |

FBNF

|   |           |          |           |
|---|-----------|----------|-----------|
| 5 | -0.134318 | 0.000000 | -0.628680 |
| 7 | -0.125634 | 0.000000 | 0.631779  |
| 9 | 0.598484  | 0.000000 | 1.753168  |
| 9 | -0.426148 | 0.000000 | -1.895285 |
